# Supplementary material for: A multi-omics strategy resolves the elusive nature of alkaloids in Podophyllum species
Source: Royal Society of Chemistry journal article supplement (doi:10.1039/c4mb00403e), 2014-08-18
Supplement: c4mb00403e1.pdf [file c4mb00403e1.pdf]

### Supplemental Information

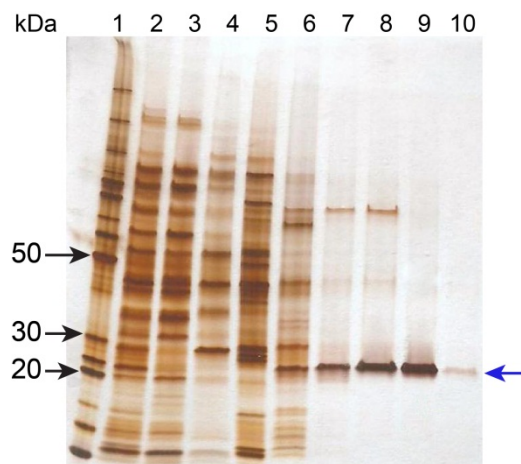

**Fig. S1** Purification of *Podophyllum hexandrum* norcoclaurine synthase (PhNCS). Lane 1: molecular weight markers; lane 2: crude enzyme extract; lane 3: flow through, lanes 4 to 10 show the His-tagged fusion PhNCS protein eluted with imidazole (5, 50, 100, 150, 200, 300 and 400 mM, respectively) in Tris·HCl, pH 7.9, 500 mM NaCl

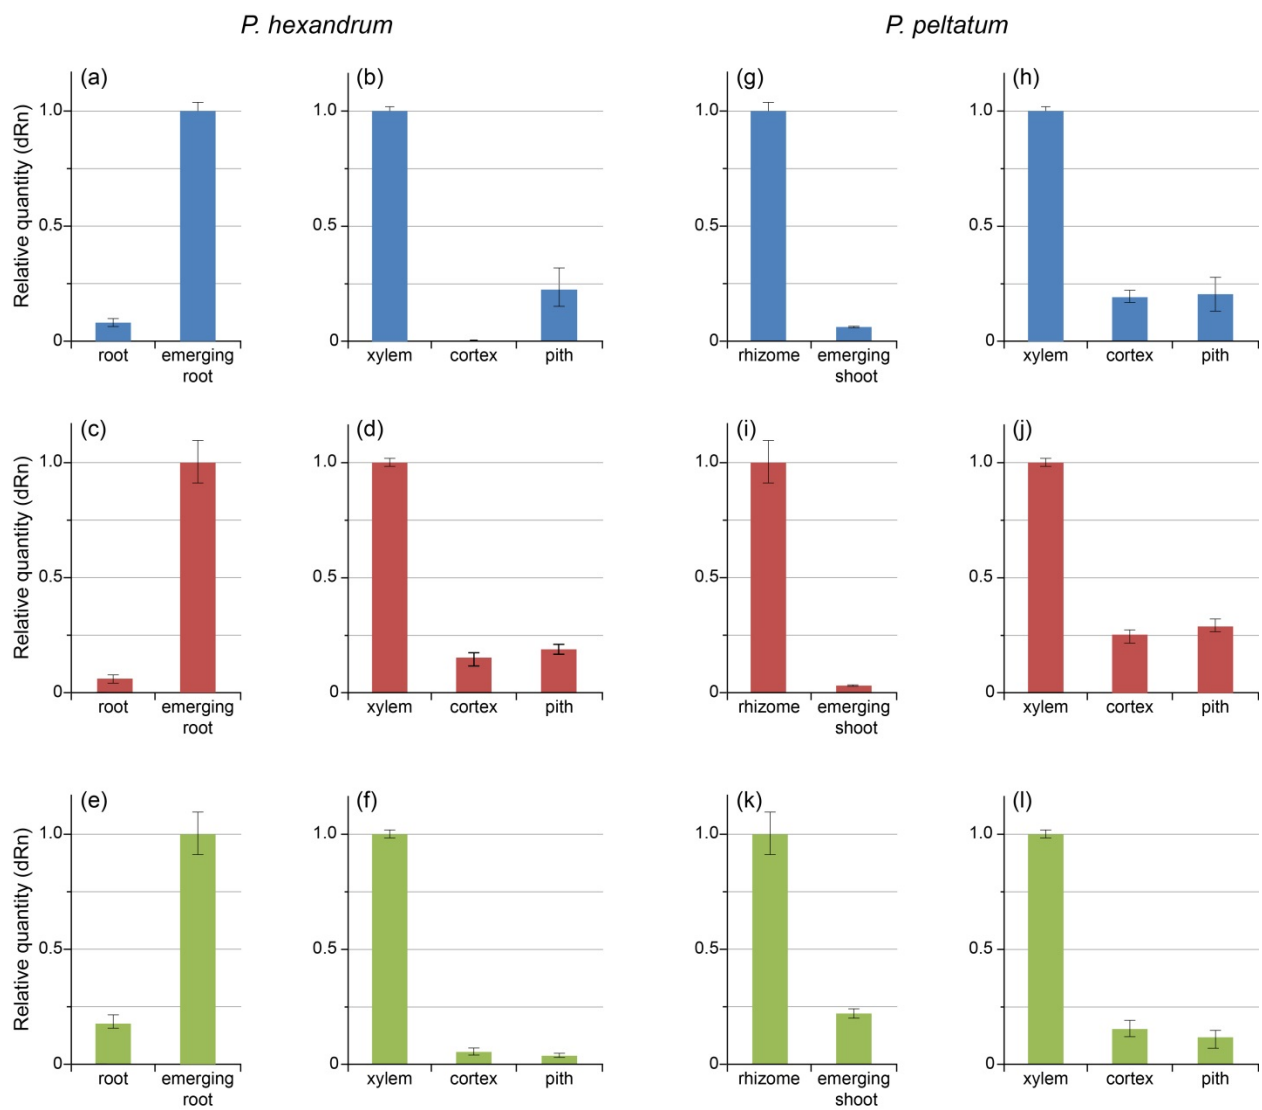

**Fig. S2** Expression levels of norcochlorine 6-*O*-methyltransferase (a, b, g, h), corytuberine synthase (c, d, i and j) and cochlorine *N*-methyltransferase (e, f, k and l) in *P. hexandrum* (a to f) and *P. peltatum* (g to l).
